# Supplementary material for: Shortening CN⋯Br–Csp3 halogen bonds via π-stacking
Source: Royal Society of Chemistry journal article supplement (doi:10.1039/d4ce00307a), 2024-01-01
Supplement: d4ce00307a1.pdf [file d4ce00307a1.pdf]

## ELECTRONIC SUPPORTING INFORMATION

### Shortening $C\equiv N\cdots Br-C_{sp3}$ halogen bonds via $\pi$ -stacking

Kamil Kupietz,<sup>a</sup> Rosa M. Gomila,<sup>b</sup> Thierry Roisnel,<sup>a</sup> Antonio Frontera<sup>\*b</sup> and Rafael Gramage-Doria<sup>a</sup>

[a] Univ. Rennes, CNRS, ISCR– UMR6226, F-35000 Rennes (France). e-mail: rafael.gramage-doria@univ-rennes1.fr

[b] Departament de Química, Universitat de les Illes Balears, Crta. de Valldemossa km 7.5, 07122 Palma de Mallorca (Balears), Spain. e-mail: toni.frontera@uib.es

## 1. General methods.

Solvents were purified with an MB SPS-800 purification system. All solvent used for catalytic experiment were dried with CaH<sub>2</sub> and distilled prior to use. CDCl<sub>3</sub> was filtered through alumina and stored under argon over molecular sieves. All the other employed chemicals were purchased from commercial sources and used as received. Unless otherwise specified, reactions were carried out under argon atmosphere by employing standard Schlenk and vacuum-line techniques. <sup>1</sup>H and <sup>13</sup>C NMR spectra were recorded with a Bruker GPX (400 MHz) spectrometer. <sup>1</sup>H NMR spectra were referenced to residual protiated solvent ( $\delta = 7.26$  ppm for CDCl<sub>3</sub>). <sup>13</sup>C NMR spectra were referenced to CDCl<sub>3</sub> ( $\delta = 77.16$  ppm). Abbreviations for signal couplings are: br, broad; s, singlet; d, doublet; t, triplet; q, quadruplet; hept, heptuplet; m, multiplet; dd, doublet of doublets; dt, triplet of doublets; td, doublet of triplets; tt, triplet of triplets; tdd, doublet of doublet of triplets. Coupling constants, *J*, were reported in hertz unit (Hz).

## 2. Synthesis and characterization of 2-(dibromomethyl)benzonitrile (1).

To a solution of 2-methylbenzonitrile (5.05 mL, 43 mmol) in CCl<sub>4</sub> (50 mL) was added NBS (22.82 g, 128 mmol) successively. The reaction mixture was heated at 80°C in the presence of light for 24 h and monitored by TLC. After that the solvent was evaporated and the residue was dissolved in EtOAc and extracted with saturated Na<sub>2</sub>S<sub>2</sub>O<sub>3</sub>. Organic layer was dried with Na<sub>2</sub>SO<sub>4</sub>, evaporated and purified by column chromatography on silica gel (petroleum ether/EtOAc 99:1 to 95:5) to give **1** as a white solid. NMR data match those reported in the literature.<sup>1</sup> The white single crystals suitable for X-ray diffraction studies were obtained by slow evaporation from a mixture of solvents (DCM/petroleum ether).

<sup>1</sup>H NMR (CDCl<sub>3</sub>, 400 MHz):  $\delta$  8.02 (d, *J* = 8.2 Hz, 1H), 7.69 (td, *J* = 7.8, 1.1 Hz, 1H), 7.59 (dd, *J* = 7.8, 1.1 Hz, 1H), 7.43 (td, *J* = 7.8, 1.1 Hz, 1H), 7.98 (s, 1H) ppm.

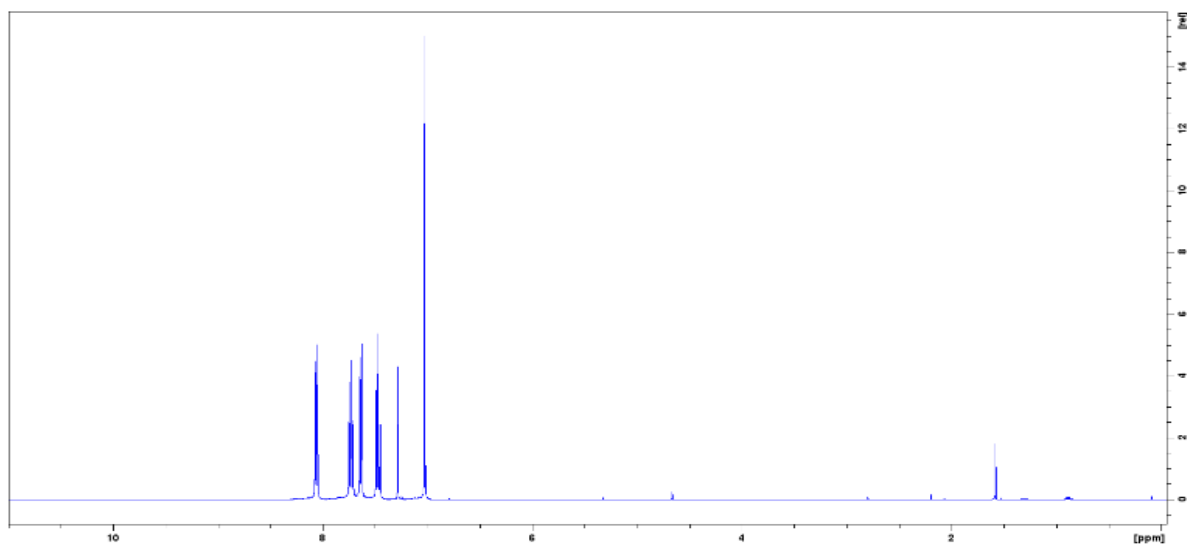

**Figure S1.**  $^1\text{H}$  NMR spectra of **1** ( $\text{CDCl}_3$ , 400 MHz, 300 K).

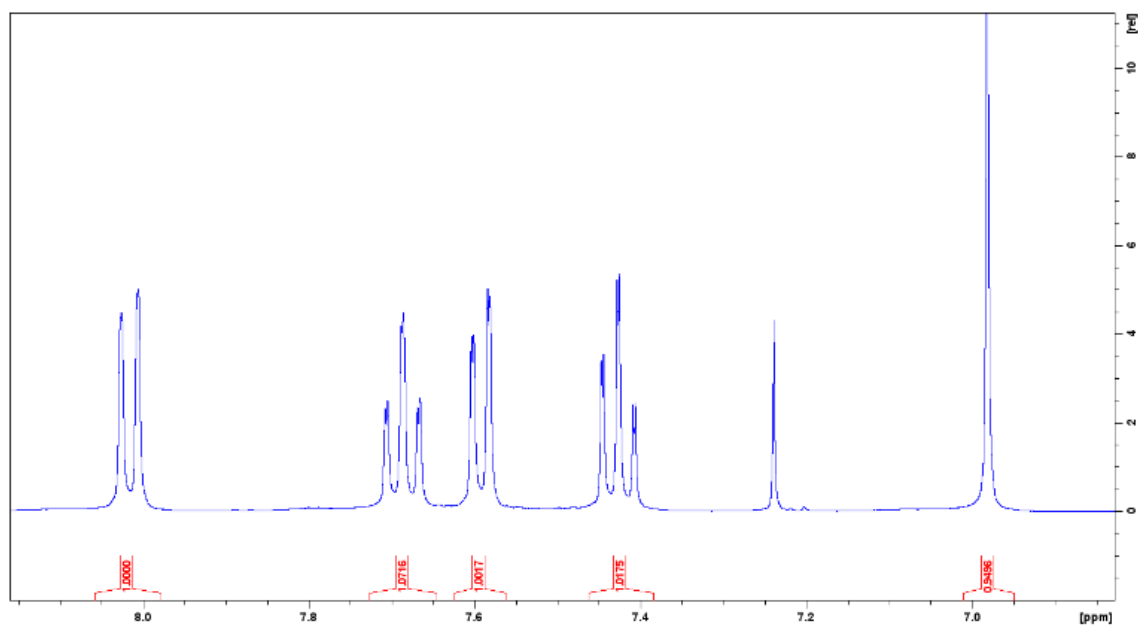

**Figure S2.**  $^1\text{H}$  NMR spectra of **1** - aromatic region ( $\text{CDCl}_3$ , 400 MHz, 300 K).

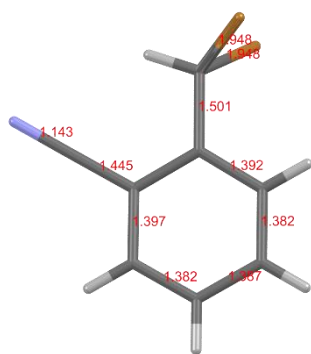

**Figure S3.** X-ray structure of **1** with bond length (Å).

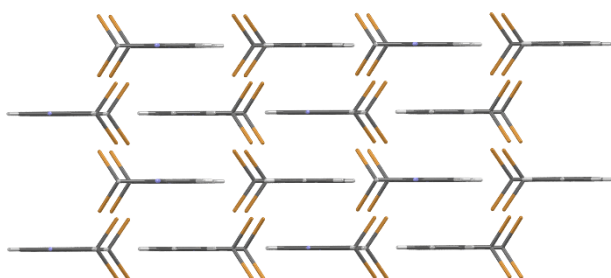

**Figure S4.** Molecular packing in the **1** crystal from X-ray diffraction analysis.

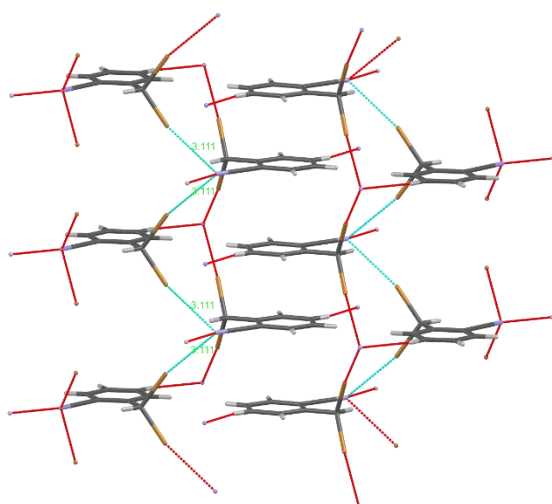

**Figure S5.** Short halogen bond (Br $\cdots$ NC, 3.111 Å) between aliphatic and aromatic part in the crystal structure of **1**.

### 3. X-ray data of 1.

#### X-ray crystallographic study

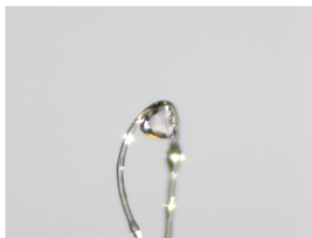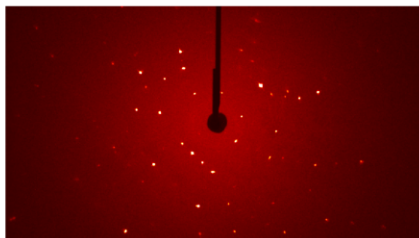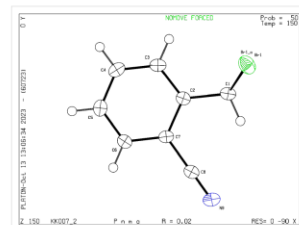

( $C_8H_5Br_2N$ );  $M = 274.95$ . A suitable crystal for X-ray diffraction single crystal experiment (colourless prism, dimensions =  $0.170 \times 0.120 \times 0.090$  mm) was selected and mounted with a cryoloop on the goniometer head of a D8 Venture (Bruker-AXS) diffractometer equipped with a CMOS-PHOTON70 detector, using Mo- $K_{\alpha}$  radiation ( $\lambda = 0.71073$  Å, multilayer monochromator) at  $T = 150(2)$  K. Crystal structure has been described in orthorhombic symmetry and  $P n m a$  (I.T.#62) centric space group ( $R_{int} = 0.0304$ ). Cell parameters have been refined as follows:  $a = 13.7185(18)$ ,  $b = 7.2021(9)$ ,  $c = 8.8003(12)$  Å,  $V = 869.5(2)$  Å<sup>3</sup>. Number of formula unit  $Z$  is equal to 4 and calculated density  $d$  and absorption coefficient  $\mu$  values are  $2.100$  g.cm<sup>-3</sup> and  $9.254$  mm<sup>-1</sup> respectively. Crystal structure was solved by dual-space algorithm using *SHELXT* program [1], and then refined with full-matrix least-squares methods based on  $F^2$  (*SHELXL* program [2]). All non-Hydrogen atoms were refined with anisotropic atomic displacement parameters. H atoms were finally included in their calculated positions and treated as riding on their parent atom with constrained thermal parameters. A final refinement on  $F^2$  with 1074 unique intensities and 64 parameters converged at  $\omega R(F^2) = 0.0523$  ( $R_F = 0.0238$ ) for 883 observed reflections with  $I > 2\sigma$ . In the CHECKCIF procedure, no A-type, B-type and C-type meaningful alerts has remained.

1. G. M. Sheldrick, *Acta Cryst.* 2015, **A71**, 3-8
2. Sheldrick G.M., *Acta Cryst.* **C71** 2015 3-8

### Data collection strategy details

Software : BIS V6.2.15/2021-03-15 && APEX4 2022.10-0  
Number of scans : 5  
Total length of scans [\*] : 291.00 (deg.)  
Total exposition time [\*] : 1 h 37 min.

[\*] fast scan not included

| Scan    | Time(s) | Width | DX(mm) | Frames | Range | 2Theta | Omega | Phi   | Chi   | T(K)  |
|---------|---------|-------|--------|--------|-------|--------|-------|-------|-------|-------|
| 1 Fast  | 2.0     | 1.00  | 34.0   | 180    | 180.0 | 0.0    | 0.0   | 0.0   | 54.7  | 150.0 |
| 2 Fast@ | 2.0     | 1.00  | 34.0   | 180    | 180.0 | 0.0    | 0.0   | 180.0 | 54.7  | 150.0 |
| 3 Omega | 20.0    | 1.00  | 34.0   | 97     | 97.0  | 0.1    | 2.7   | 144.0 | -44.5 | 150.0 |
| 4 Omega | 20.0    | 1.00  | 34.0   | 97     | 97.0  | 0.1    | 2.7   | 216.0 | -44.5 | 150.0 |
| 5 Omega | 20.0    | 1.00  | 34.0   | 97     | 97.0  | 0.1    | 2.7   | 0.0   | -44.5 | 150.0 |

@: attenuated beam

Structural data

... Crystal data ...

|                             |                                                                  |
|-----------------------------|------------------------------------------------------------------|
| Empirical formula           | C <sub>8</sub> H <sub>5</sub> Br <sub>2</sub> N                  |
| Formula weight              | 274.95 g/mol                                                     |
| Temperature                 | 150(2) K                                                         |
| Radiation type              | Mo-K $\alpha$                                                    |
| Wavelength                  | 0.71073 Å                                                        |
| Crystal system, space group | orthorhombic, <i>P</i> n m a (I.T.#62)                           |
| Unit cell dimensions        | a = 13.7185(18) Å<br>b = 7.2021(9) Å<br>c = 8.8003(12) Å         |
|                             | $\alpha = 90^\circ$<br>$\beta = 90^\circ$<br>$\gamma = 90^\circ$ |
| Volume                      | 869.5(2) Å <sup>3</sup>                                          |
| Z, Calculated density       | 4, 2.100 g.cm <sup>-3</sup>                                      |
| Absorption coefficient      | 9.254 mm <sup>-1</sup>                                           |
| F(000)                      | 520                                                              |
| Crystal size                | 0.170 x 0.120 x 0.090 mm                                         |
| Crystal color               | colourless                                                       |
| Crystal description         | prism                                                            |

... Data collection and data reduction ...

|                                               |                                          |
|-----------------------------------------------|------------------------------------------|
| Diffractometer                                | D8 Venture (Bruker-AXS)                  |
| Detector                                      | CMOS-PHOTON70                            |
| $\theta$ range for data collection            | 2.750 to 27.468°                         |
| $(\sin\theta/\lambda)_{\max}$ Å <sup>-1</sup> | 0.649                                    |
| $h_{\min}$ , $h_{\max}$                       | -17, 17                                  |
| $k_{\min}$ , $k_{\max}$                       | -9, 8                                    |
| $l_{\min}$ , $l_{\max}$                       | -11, 11                                  |
| Reflections collected / unique                | 7270 / 1074 [ $R(\text{int}) = 0.0304$ ] |
| Reflections [ $I > 2\sigma$ ]                 | 883                                      |
| Completeness to $\theta_{\max}$               | 0.999                                    |
| Absorption correction type                    | multi-scan                               |
| Max. and min. transmission                    | 0.435, 0.312                             |

... Refinement ...

|                                                 |                                                            |
|-------------------------------------------------|------------------------------------------------------------|
| Refinement method                               | Full-matrix least-squares on $F^2$                         |
| H-atom treatment                                | H-atom parameters constrained                              |
| Data / restraints / parameters                  | 1074 / 0 / 64                                              |
| <sup>b</sup> Goodness-of-fit                    | 1.045                                                      |
| Final R indices [ $I > 2\sigma$ ]               | <sup>c</sup> $R_1 = 0.0238$ , <sup>d</sup> $wR_2 = 0.0523$ |
| Final R indices [all data]                      | <sup>c</sup> $R_1 = 0.0316$ , <sup>d</sup> $wR_2 = 0.0563$ |
| <sup>e</sup> Shelxl weighting scheme parameters | a = 0.0155, b = 1.6587                                     |
| $\Delta\rho_{\min}$ , $\Delta\rho_{\max}$       | -0.604, 0.721 e.Å <sup>-3</sup>                            |

$${}^a R_{\text{int}} = \frac{\sum |F_o^2 - \langle F_o^2 \rangle|}{\sum F_o^2}$$

$${}^b S = \left\{ \frac{\sum [w(F_o^2 - F_c^2)^2]}{n-p} \right\}^{1/2}$$

$${}^c R_1 = \frac{\sum |F_o| - |F_c|}{\sum |F_o|}$$

$${}^d wR_2 = \left\{ \frac{\sum [w(F_o^2 - F_c^2)^2]}{\sum [w(F_o^2)^2]} \right\}^{1/2}$$

$${}^e w = 1./[\sigma^2(F_o^2) + (aP)^2 + bP] \text{ with } P = [2F_c^2 + \text{Max}(F_o^2, 0)]/3$$

Fractional atomic coordinates, site occupancy (%) and equivalent isotropic displacement parameters ( $\text{\AA}^2$ ).

$U(\text{eq})$  is defined as one third of the trace of the orthogonalized  $U_{ij}$  tensor.

| Atom | x          | y          | z          | occ. | $U(\text{eq})$ | adp  |
|------|------------|------------|------------|------|----------------|------|
| Br1  | 0.20624(2) | 0.53161(4) | 0.49716(3) | 1    | 0.03419(11)    | Uani |
| C1   | 0.2813(3)  | 0.750000   | 0.4390(4)  | 1    | 0.0270(8)      | Uani |
| H1   | 0.288738   | 0.749999   | 0.325936   | 1    | 0.032          | Uiso |
| C2   | 0.3811(2)  | 0.750000   | 0.5090(4)  | 1    | 0.0220(6)      | Uani |
| C3   | 0.3941(3)  | 0.750000   | 0.6659(4)  | 1    | 0.0272(8)      | Uani |
| H3   | 0.338674   | 0.750000   | 0.730562   | 1    | 0.033          | Uiso |
| C4   | 0.4862(3)  | 0.750000   | 0.7295(4)  | 1    | 0.0284(8)      | Uani |
| H4   | 0.493816   | 0.750000   | 0.836794   | 1    | 0.034          | Uiso |
| C5   | 0.5675(3)  | 0.750000   | 0.6359(4)  | 1    | 0.0268(8)      | Uani |
| H5   | 0.630802   | 0.750000   | 0.679584   | 1    | 0.032          | Uiso |
| C6   | 0.5572(3)  | 0.750000   | 0.4797(4)  | 1    | 0.0247(7)      | Uani |
| H6   | 0.613112   | 0.750000   | 0.416034   | 1    | 0.030          | Uiso |
| C7   | 0.4639(3)  | 0.750000   | 0.4161(4)  | 1    | 0.0202(7)      | Uani |
| C8   | 0.4538(2)  | 0.750000   | 0.2527(4)  | 1    | 0.0234(7)      | Uani |
| N9   | 0.4454(2)  | 0.750000   | 0.1235(3)  | 1    | 0.0310(7)      | Uani |



Anisotropic displacement parameters ( $\text{\AA}^2$ )

The anisotropic displacement factor exponent takes the form:  $-2\pi[h^2a^2U_{11} + \dots + 2hka^*b^*U_{12}]$

| Atom | U11         | U22         | U33         | U23          | U13         | U12          |
|------|-------------|-------------|-------------|--------------|-------------|--------------|
| Br1  | 0.02691(15) | 0.03073(16) | 0.04492(17) | -0.00872(12) | 0.00188(12) | -0.00423(10) |
| C1   | 0.0242(18)  | 0.035(2)    | 0.0221(16)  | 0.000        | 0.0056(14)  | 0.000        |
| C2   | 0.0218(15)  | 0.0215(16)  | 0.0226(15)  | 0.000        | 0.0026(14)  | 0.000        |
| C3   | 0.0276(18)  | 0.0324(19)  | 0.0215(16)  | 0.000        | 0.0058(14)  | 0.000        |
| C4   | 0.036(2)    | 0.031(2)    | 0.0191(16)  | 0.000        | -0.0004(14) | 0.000        |
| C5   | 0.0251(18)  | 0.0271(18)  | 0.0282(18)  | 0.000        | -0.0051(14) | 0.000        |
| C6   | 0.0213(16)  | 0.0272(18)  | 0.0255(17)  | 0.000        | 0.0030(14)  | 0.000        |
| C7   | 0.0247(17)  | 0.0170(15)  | 0.0188(15)  | 0.000        | 0.0031(13)  | 0.000        |
| C8   | 0.0217(16)  | 0.0229(17)  | 0.0254(17)  | 0.000        | 0.0041(13)  | 0.000        |
| N9   | 0.0335(17)  | 0.0378(18)  | 0.0218(15)  | 0.000        | 0.0048(13)  | 0.000        |

Bond length [Å]

|     |   |    |   |          |
|-----|---|----|---|----------|
| Br1 | - | C1 | = | 1.948(2) |
| C1  | - | C2 | = | 1.501(5) |
| C1  | - | H1 | = | 1.0000   |
| C2  | - | C3 | = | 1.393(5) |
| C2  | - | C7 | = | 1.401(5) |
| C3  | - | C4 | = | 1.381(5) |
| C3  | - | H3 | = | 0.9500   |
| C4  | - | C5 | = | 1.385(5) |
| C4  | - | H4 | = | 0.9500   |
| C5  | - | C6 | = | 1.383(5) |
| C5  | - | H5 | = | 0.9500   |
| C6  | - | C7 | = | 1.396(5) |
| C6  | - | H6 | = | 0.9500   |
| C7  | - | C8 | = | 1.445(5) |
| C8  | - | N9 | = | 1.143(4) |

## Angles [°]

|        |      |          |   |            |
|--------|------|----------|---|------------|
| C2     | - C1 | - Br1_#1 | = | 111.96(15) |
| C2     | - C1 | - Br1    | = | 111.96(15) |
| Br1_#1 | - C1 | - Br1    | = | 107.66(16) |
| C2     | - C1 | - H1     | = | 108.4      |
| Br1_#1 | - C1 | - H1     | = | 108.4      |
| Br1    | - C1 | - H1     | = | 108.4      |
| C3     | - C2 | - C7     | = | 118.3(3)   |
| C3     | - C2 | - C1     | = | 121.7(3)   |
| C7     | - C2 | - C1     | = | 120.0(3)   |
| C4     | - C3 | - C2     | = | 121.3(3)   |
| C4     | - C3 | - H3     | = | 119.4      |
| C2     | - C3 | - H3     | = | 119.4      |
| C3     | - C4 | - C5     | = | 119.7(3)   |
| C3     | - C4 | - H4     | = | 120.2      |
| C5     | - C4 | - H4     | = | 120.2      |
| C6     | - C5 | - C4     | = | 120.6(3)   |
| C6     | - C5 | - H5     | = | 119.7      |
| C4     | - C5 | - H5     | = | 119.7      |
| C5     | - C6 | - C7     | = | 119.5(3)   |
| C5     | - C6 | - H6     | = | 120.3      |
| C7     | - C6 | - H6     | = | 120.3      |
| C6     | - C7 | - C2     | = | 120.6(3)   |
| C6     | - C7 | - C8     | = | 119.1(3)   |
| C2     | - C7 | - C8     | = | 120.2(3)   |
| N9     | - C8 | - C7     | = | 179.7(4)   |

Symmetry transformations used to generate equivalent atoms:

$$\#1 \quad x, -y-1/2, z \quad + T = [0, 2, 0] : \quad (+x, -y+3/2, +z)$$

## Torsion angles [°]

|        |      |      |      |   |             |
|--------|------|------|------|---|-------------|
| Br1_#1 | - C1 | - C2 | - C3 | = | 60.50(15)   |
| Br1    | - C1 | - C2 | - C3 | = | -60.50(15)  |
| Br1_#1 | - C1 | - C2 | - C7 | = | -119.50(15) |
| Br1    | - C1 | - C2 | - C7 | = | 119.50(15)  |
| C7     | - C2 | - C3 | - C4 | = | 0.000(1)    |
| C1     | - C2 | - C3 | - C4 | = | 180.000(1)  |
| C2     | - C3 | - C4 | - C5 | = | 0.000(1)    |
| C3     | - C4 | - C5 | - C6 | = | 0.000(1)    |
| C4     | - C5 | - C6 | - C7 | = | 0.000(1)    |
| C5     | - C6 | - C7 | - C2 | = | 0.000(0)    |
| C5     | - C6 | - C7 | - C8 | = | 180.000(1)  |
| C3     | - C2 | - C7 | - C6 | = | 0.000(0)    |
| C1     | - C2 | - C7 | - C6 | = | 180.000(0)  |
| C3     | - C2 | - C7 | - C8 | = | 180.000(0)  |
| C1     | - C2 | - C7 | - C8 | = | 0.000(0)    |

Symmetry transformations used to generate equivalent atoms:

$$\#1 \quad x, -y-1/2, z \quad + T = [0, 2, 0] : \quad (+x, -y+3/2, +z)$$

Structure visualization

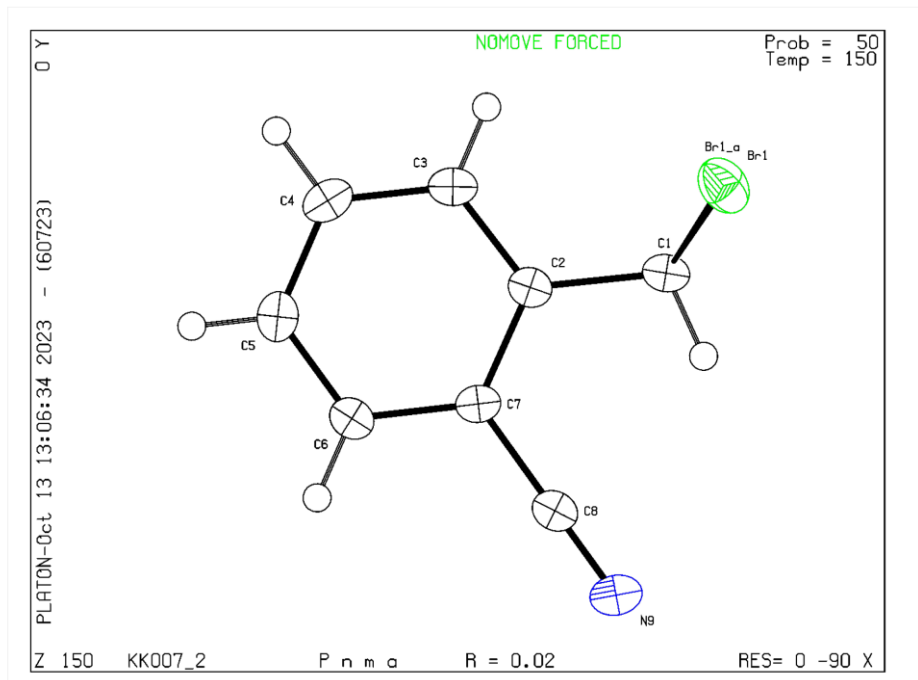

#### 4. Theoretical methods.

The optimization using periodic boundary conditions were performed at the BP86-D3/def2-TZVP level of theory. This geometry was used to analyze the energetic features of the adducts analyzed in this work, that were calculated at the PBE0<sup>2</sup>-D3<sup>3</sup>/def2-TZVP<sup>4</sup> level of theory using the fully optimized geometries. The Turbomole 7.7 program<sup>5</sup> has been used for the optimizations and energetic calculations. The NBO analysis<sup>6</sup> was performed using the NBO 7.0 program.<sup>7</sup> Molecular electrostatic potential (MEP) surfaces have been computed at the same level of theory and represented using 0.001 a.u. isovalue of electron density to map the electrostatic potential. The NCIPLOT analysis<sup>8</sup> has been performed using the AIMAll program at the same level of theory.<sup>9</sup> For the NCIPLOT analysis, the following setting were used, S = 0.5,  $\rho$  cut-off = 0.04 a.u., color scale  $-0.035 \leq \text{sign}(\lambda_2)\rho \leq -0.035$  a.u. For the evaluation of the HB and HaBs energies using the QTAIM analysis, the equations proposed in the literature were used.<sup>10,11</sup>

## 5. XYZ cartesian coordinates

|    |            |           |           |
|----|------------|-----------|-----------|
| C  | -1.050349  | -1.425625 | 0.892267  |
| H  | -2.119915  | -1.300764 | 0.724412  |
| C  | -0.328165  | -2.376227 | 0.176833  |
| H  | -0.838682  | -3.000140 | -0.557191 |
| C  | 1.044435   | -2.532318 | 0.396210  |
| H  | 1.613380   | -3.276716 | -0.163116 |
| C  | 1.692635   | -1.731029 | 1.336911  |
| H  | 2.762603   | -1.851219 | 1.509343  |
| C  | 0.993051   | -0.768263 | 2.070056  |
| C  | -0.397918  | -0.617247 | 1.840890  |
| C  | -1.151745  | 0.352075  | 2.565735  |
| N  | -1.755315  | 1.149234  | 3.166235  |
| C  | 1.675890   | 0.096791  | 3.081070  |
| H  | 0.993393   | 0.798796  | 3.569348  |
| Br | 2.495070   | -0.938935 | 4.544420  |
| Br | 3.099002   | 1.212027  | 2.296101  |
| N  | 5.745711   | 2.591694  | 1.484535  |
| C  | 6.553357   | 1.885862  | 1.026223  |
| C  | 7.527313   | 1.015228  | 0.454920  |
| C  | 8.862060   | 1.096800  | 0.891498  |
| H  | 9.133286   | 1.822116  | 1.658254  |
| C  | 9.824139   | 0.253682  | 0.343330  |
| H  | 10.857117  | 0.320981  | 0.685192  |
| C  | 9.470500   | -0.675588 | -0.640684 |
| H  | 10.222473  | -1.338025 | -1.072434 |
| C  | 8.146742   | -0.757378 | -1.074517 |
| H  | 7.869184   | -1.481220 | -1.841563 |
| C  | 7.159414   | 0.076501  | -0.541972 |
| C  | 5.737221   | -0.001235 | -0.998369 |
| H  | 5.087623   | 0.715627  | -0.487063 |
| Br | 4.925300   | -1.767420 | -0.671899 |
| Br | 5.529271   | 0.383578  | -2.920318 |
| C  | 0.397918   | 0.617247  | -1.840890 |
| C  | 1.050349   | 1.425625  | -0.892267 |
| H  | 2.119915   | 1.300764  | -0.724412 |
| C  | 0.328165   | 2.376227  | -0.176833 |
| H  | 0.838682   | 3.000140  | 0.557191  |
| C  | -1.044435  | 2.532318  | -0.396210 |
| H  | -1.613380  | 3.276716  | 0.163116  |
| C  | -1.692635  | 1.731029  | -1.336911 |
| H  | -2.762603  | 1.851219  | -1.509343 |
| C  | -0.993051  | 0.768263  | -2.070056 |
| C  | 1.151745   | -0.352075 | -2.565735 |
| N  | 1.755315   | -1.149234 | -3.166235 |
| C  | -1.675890  | -0.096791 | -3.081070 |
| H  | -0.993393  | -0.798796 | -3.569348 |
| Br | -3.099002  | -1.212027 | -2.296101 |
| Br | -2.495070  | 0.938935  | -4.544420 |
| N  | -5.745711  | -2.591694 | -1.484535 |
| C  | -6.553357  | -1.885862 | -1.026223 |
| C  | -7.527313  | -1.015228 | -0.454920 |
| C  | -8.862060  | -1.096800 | -0.891498 |
| H  | -9.133286  | -1.822116 | -1.658254 |
| C  | -9.824139  | -0.253682 | -0.343330 |
| H  | -10.857117 | -0.320981 | -0.685192 |
| C  | -9.470500  | 0.675588  | 0.640684  |
| H  | -10.222473 | 1.338025  | 1.072434  |
| C  | -8.146742  | 0.757378  | 1.074517  |
| H  | -7.869184  | 1.481220  | 1.841563  |
| C  | -7.159414  | -0.076501 | 0.541972  |
| C  | -5.737221  | 0.001235  | 0.998369  |
| H  | -5.087623  | -0.715627 | 0.487063  |
| Br | -5.529271  | -0.383578 | 2.920318  |
| Br | -4.925300  | 1.767420  | 0.671899  |

## 6. References.

1. C. Sun and B. Xu, *J. Org. Chem.*, 2008, **73**, 7361–7364.
2. C. Adamo and V. Barone, *J. Chem. Phys.*, 1999, **110**, 6158–6170.
3. S. Grimme, J. Antony, S. Ehrlich and H. Krieg, *J. Chem. Phys.*, 2010, **132**, 154104.
4. F. Weigend, *Phys. Chem. Chem. Phys.*, 2006, **8**, 1057–1065.
5. R. Ahlrichs, M. Bar, M. Haser, H. Horn and C. Kolmel, *Chem. Phys. Lett.*, 1989, **162**, 165–169.
6. E. D. Glendening, C. R. Landis and F. Weinhold, *J. Comput. Chem.*, 2019, **40**, 2234–2241.
7. E. D. Glendening, J. K. Badenhoop, A. E. Reed, J. E. Carpenter, J. A. Bohmann, C. M. Morales, P. Karafiloglou, C. R. Landis and F. Weinhold, NBO 7.0, Theoretical Chemistry Institute, University of Wisconsin, Madison, 2018.
8. E. R. Johnson, S. Keinan, P. Mori-Sánchez, J. Contreras-García, A. J. Cohen and W. Yang, *J. Am. Chem. Soc.*, 2010, **132**, 6498–6506.
9. AIMAll (Version 19.10.12), Todd A. Keith, TK Gristmill Software, Overland Park KS, USA, 2019 (aim.tkgristmill.com)
10. E. Espinosa, E. Molins and C. Lecomte, *Chem. Phys. Lett.* 1998, **285**, 170–173.
11. E. V. Bartashevich and V.G. Tsirelson, *Russ. Chem. Rev.*, 2014, **83**, 1181–1203.
